# Supplementary material for: Affinity-based target deconvolution of safranal
Source: PubMed Central journal article supplement (PMC3614472; doi:10.1186/2008-2231-21-25), 2013-03-20
Supplement: 2008-2231-21-25-S1.pdf [file 2008-2231-21-25-S1.pdf]

# Results from MASCOT search

## 1. Beta-actin-like protein 2

### Analysis Information

Report Type Protein-Peptide Summary by Spot Analysis Type Combined (MS+MSMS)  
 Sample Set Name 2011-05-04 [001300010097-2011-03-18-1] Database SwissProt  
 Analysis Name Khalil-Medicinal Chemistry[Mus Swissprot] Creation Date 05/04/2011 13:12:29  
 Reported By 05/04/2011 17:22:24 - admin Last Modified 05/04/2011 13:18:54  
 MS Acq.: Proc. Methods (Unspecified): (Unspecified)  
 Interpretation Method (Unspecified)

| Gel Idx/Pos    | 325/N3                                                             | Instr./Gel Origin                   | Ak115/2011-03-18-1 | Process Status  | Analysis Succeeded |                   |            |                   |                |                     |
|----------------|--------------------------------------------------------------------|-------------------------------------|--------------------|-----------------|--------------------|-------------------|------------|-------------------|----------------|---------------------|
| Plate [#] Name | [1] 001300010097                                                   | Instrument Sample Name              |                    | Spectra         | 6                  |                   |            |                   |                |                     |
| Rank           | Protein Name                                                       | Accession No.                       | Protein Score      | Protein C. I. % | Total Ion Score    | Total Ion C. I. % | Protein MW | Protein Spot Name | Pep. User name | Department          |
| 1              | RecName: Full=Beta-actin-like protein 2; AltName: Full=Kappa-actin | gi 81895969 sp Q8BFZ3.1 ACTBL_MOUSE | 224                | 100             | 194                | 100               | 42319.1    | 5.3 A-K-1         | 6 Khalil       | Medicinal Chemistry |

| Peptide Information |             |        |       |            |                   |           |         |                   |      |             |
|---------------------|-------------|--------|-------|------------|-------------------|-----------|---------|-------------------|------|-------------|
| Calc. Mass          | Obsrv. Mass | ± da   | ± ppm | Start Seq. | End Sequence Seq. | Ion Score | C. I. % | Modification      | Rank | Result Type |
| 923.5672            | 923.5939    | 0.0267 | 29    | 330        | 337               | 337       |         |                   |      | Mascot      |
| 1036.6514           | 1036.6608   | 0.0094 | 9     | 328        | 336               | 336       |         |                   |      | Mascot      |
| 1232.6599           | 1232.6783   | 0.0214 | 17    | 30         | 40                | 40        |         | Oxidation (M)[8]  |      | Mascot      |
| 1638.8359           | 1639.9365   | 0.1006 | 61    | 179        | 192               | 192       |         | Oxidation (M)[13] |      | Mascot      |
| 1790.892            | 1790.9762   | 0.0842 | 47    | 240        | 255               | 255       | 131     | 100               |      | Mascot      |
| 1790.892            | 1790.9762   | 0.0842 | 47    | 240        | 255               | 255       |         |                   |      | Mascot      |
| 1954.0645           | 1954.1536   | 0.0891 | 46    | 97         | 114               | 114       | 63      | 99.999            |      | Mascot      |
| 1954.0645           | 1954.1536   | 0.0891 | 46    | 97         | 114               | 114       |         |                   |      | Mascot      |

## 2. Cytochrome b-c1 complex subunit 1

### Analysis Information

Report Type Protein-Peptide Summary by Spot Analysis Type Combined (MS+MSMS)  
 Sample Set Name 2011-05-04 [001300010097-2011-03-18-1] Database SwissProt  
 Analysis Name Khalil-Medicinal Chemistry[Mus Swissprot] Creation Date 05/04/2011 13:12:29  
 Reported By 05/04/2011 17:22:25 - admin Last Modified 05/04/2011 13:18:54  
 MS Acq.: Proc. Methods (Unspecified): (Unspecified)  
 Interpretation Method (Unspecified)

| Gel Idx/Pos    | 327/N5                                                                                              | Instr./Gel Origin                  | Ak115/2011-03-18-1 | Process Status  | Analysis Succeeded |                   |            |                   |                |                     |
|----------------|-----------------------------------------------------------------------------------------------------|------------------------------------|--------------------|-----------------|--------------------|-------------------|------------|-------------------|----------------|---------------------|
| Plate [#] Name | [1] 001300010097                                                                                    | Instrument Sample Name             |                    | Spectra         | 6                  |                   |            |                   |                |                     |
| Rank           | Protein Name                                                                                        | Accession No.                      | Protein Score      | Protein C. I. % | Total Ion Score    | Total Ion C. I. % | Protein MW | Protein Spot Name | Pep. User name | Department          |
| 1              | RecName: Full=Cytochrome b-c1 complex subunit 1, mitochondrial; AltName: Full=Complex III subunit 1 | gi 14548301 sp Q9CZ13.1 QCRI_MOUSE | 265                | 100             | 196                | 100               | 53419.7    | 5.75 A-L-1        | 11 Khalil      | Medicinal Chemistry |

| Peptide Information |             |        |       |            |                   |           |         |                        |      |             |
|---------------------|-------------|--------|-------|------------|-------------------|-----------|---------|------------------------|------|-------------|
| Calc. Mass          | Obsrv. Mass | ± da   | ± ppm | Start Seq. | End Sequence Seq. | Ion Score | C. I. % | Modification           | Rank | Result Type |
| 912.4396            | 912.4599    | 0.0173 | 19    | 473        | 479               | 479       |         | Oxidation (M)[3]       |      | Mascot      |
| 1059.5081           | 1059.5363   | 0.0282 | 27    | 473        | 480               | 480       |         | Oxidation (M)[3]       |      | Mascot      |
| 1100.5735           | 1100.6115   | 0.038  | 35    | 424        | 432               | 432       |         |                        |      | Mascot      |
| 1110.5426           | 1110.5802   | 0.0376 | 34    | 214        | 222               | 222       |         |                        |      | Mascot      |
| 1202.6198           | 1202.6586   | 0.0388 | 32    | 433        | 442               | 442       |         |                        |      | Mascot      |
| 1218.6147           | 1218.6503   | 0.0356 | 29    | 433        | 442               | 442       |         | Oxidation (M)[8]       |      | Mascot      |
| 1256.6746           | 1256.7097   | 0.0321 | 26    | 423        | 432               | 432       | 41      | 99.719                 |      | Mascot      |
| 1256.6746           | 1256.7097   | 0.0321 | 26    | 423        | 432               | 432       |         |                        |      | Mascot      |
| 1538.7479           | 1538.8057   | 0.0578 | 38    | 379        | 392               | 392       |         | Carbamidomethyl (C)[2] |      | Mascot      |
| 1605.7577           | 1605.7983   | 0.0406 | 25    | 256        | 269               | 269       | 71      | 100                    |      | Mascot      |
| 1605.7577           | 1605.7983   | 0.0406 | 25    | 256        | 269               | 269       |         |                        |      | Mascot      |
| 1646.8132           | 1646.8577   | 0.0445 | 27    | 112        | 126               | 126       |         |                        |      | Mascot      |
| 2053.9971           | 2054.0491   | 0.052  | 25    | 397        | 415               | 415       | 84      | 100                    |      | Mascot      |
| 2053.9971           | 2054.0491   | 0.052  | 25    | 397        | 415               | 415       |         |                        |      | Mascot      |
| 2602.3259           | 2602.3831   | 0.0572 | 22    | 112        | 134               | 134       |         |                        |      | Mascot      |

### 3. ATP synthase subunit alpha

#### Analysis Information

|                         |                                         |               |                     |
|-------------------------|-----------------------------------------|---------------|---------------------|
| Report Type             | Protein-Peptide Summary by Spot         | Analysis Type | Combined (MS+MSMS)  |
| Sample Set Name         | 2011-05-04 [001300010097-2011-03-18-1]  | Database      | SwissProt           |
| Analysis Name           | Khalil-Medical Chemistry[Mus Swissprot] | Creation Date | 05/04/2011 13:12:29 |
| Reported By             | 05/04/2011 17:22:26 - admin             | Last Modified | 05/04/2011 13:18:54 |
| MS Acq. : Proc. Methods | (Unspecified) : (Unspecified)           |               |                     |
| Interpretation Method   | (Unspecified)                           |               |                     |

| Rank | Protein Name                                                              | Accession No.                  | Protein Score | Protein Score C. I. % | Total Ion Score | Total Ion C. I. % | Protein MW | Protein PI | Spot Name | Pep. User name | Department        |
|------|---------------------------------------------------------------------------|--------------------------------|---------------|-----------------------|-----------------|-------------------|------------|------------|-----------|----------------|-------------------|
| 2    | RecName: Full=ATP synthase subunit alpha, mitochondrial; Flags: Precursor | g 416677 p Q03265.1 ATPA_MOUSE | 139           | 100                   | 97              | 100               | 59829.6    | 9.22       | A-L-2     | 10 Khalil      | Medical Chemistry |

| Peptide Information |             |        |       |            |                       |           |         |                  |      |             |  |
|---------------------|-------------|--------|-------|------------|-----------------------|-----------|---------|------------------|------|-------------|--|
| Calc. Mass          | Obsrv. Mass | ± da   | ± ppm | Start Seq. | End Sequence Seq.     | Ion Score | C. I. % | Modification     | Rank | Result Type |  |
| 1000.6036           | 1000.6279   | 0.0243 | 24    | 124        | 132 LIKEGDVVK         |           |         |                  |      | Mascot      |  |
| 1026.5942           | 1026.6487   | 0.0545 | 53    | 195        | 204 AVDSLVPKGR        |           |         |                  |      | Mascot      |  |
| 1120.7201           | 1120.7817   | 0.0616 | 55    | 172        | 182 VGLKARGWPR        |           |         |                  |      | Mascot      |  |
| 1228.6848           | 1228.7469   | 0.0621 | 51    | 208        | 218 ELIKGDRQTGK       |           |         |                  |      | Mascot      |  |
| 1358.7461           | 1358.8114   | 0.0653 | 48    | 183        | 194 ISVREPMQTGK       |           |         |                  |      | Mascot      |  |
| 1374.741            | 1374.8071   | 0.0661 | 48    | 183        | 194 ISVREPMQTGK       |           |         | Oxidation (M)[7] |      | Mascot      |  |
| 1438.8489           | 1438.9028   | 0.0539 | 37    | 403        | 416 GIRPAINVGLSVSR    |           |         |                  |      | Mascot      |  |
| 1439.8264           | 1439.8993   | 0.0629 | 44    | 323        | 334 QMSLLLRPPGGR      |           |         | Oxidation (M)[2] |      | Mascot      |  |
| 1553.7383           | 1553.8164   | 0.0781 | 50    | 335        | 347 EAYPGDVFYLHSR     | 97        | 100     |                  |      | Mascot      |  |
| 1553.7383           | 1553.8164   | 0.0781 | 50    | 335        | 347 EAYPGDVFYLHSR     |           |         |                  |      | Mascot      |  |
| 1624.8904           | 1624.982    | 0.0716 | 44    | 134        | 149 TGAIVDVPVGEELLGR  |           |         |                  |      | Mascot      |  |
| 1780.9916           | 1781.047    | 0.0554 | 31    | 133        | 149 RTGAINVDPVGEELLGR |           |         |                  |      | Mascot      |  |

### 4. ATP synthase subunit beta

**Analysis Information**

Report Type Protein-Peptide Summary by Spot Analysis Type Combined (MS+MSMS)  
 Sample Set Name 2011-05-04 [001300010097-2011-03-18-1] Database SwissProt  
 Analysis Name Khalil-Medicalin Chemistry[Mus Swissprot] Creation Date 05/04/2011 13:12:29  
 Reported By 05/04/2011 17:22:26 - admin Last Modified 05/04/2011 13:18:54  
 MS Acq.: Proc. Methods (Unspecified): (Unspecified)  
 Interpretation Method (Unspecified)

| Gel Idx/Pos    | 328N6                                                                    | Instr./Gel Origin                  | Ak1152011-03-18-1 | Process Status  | Analysis Succeeded |                   |            |            |           |                |                     |
|----------------|--------------------------------------------------------------------------|------------------------------------|-------------------|-----------------|--------------------|-------------------|------------|------------|-----------|----------------|---------------------|
| Plate [P] Name | [1] 001300010097                                                         | Instrument Sample Name             |                   | Spectra         | 6                  |                   |            |            |           |                |                     |
| Rank           | Protein Name                                                             | Accession No.                      | Protein Score     | Protein C. I. % | Total Ion Score    | Total Ion C. I. % | Protein MW | Protein PI | Spot Name | Pep. User name | Department          |
| 1              | RecName: Full=ATP synthase subunit beta, mitochondrial; Flags: Precursor | gi 20455479 sp P56480.2 ATPB_MOUSE | 485               | 100             | 367                | 100               | 56265.5    | 5.19       | A-L-2     | 15 Kha         | Medicinal Chemistry |

**Peptide Information**

| Calc. Mass | Obsrv. Mass | ± da   | ± ppm | Start Seq. | End Seq. | Sequence          | Ion Score | C. I. % | Modification     | Rank | Result Type |
|------------|-------------|--------|-------|------------|----------|-------------------|-----------|---------|------------------|------|-------------|
| 1262.6409  | 1262.7026   | 0.0617 | 49    | 110        | 121      | TIAMDGTEGLVR      |           |         |                  |      | Mascot      |
| 1385.7094  | 1385.7786   | 0.0692 | 50    | 144        | 155      | IMNVIGEPDIDR      |           |         |                  |      | Mascot      |
| 1401.7042  | 1401.7753   | 0.0711 | 51    | 144        | 155      | IMNVIGEPDIDR      |           |         | Oxidation (M)[2] |      | Mascot      |
| 1406.881   | 1406.7907   | 0.0697 | 50    | 238        | 239      | AHGGYSVFAGVGER    | 127       | 100     |                  |      | Mascot      |
| 1406.881   | 1406.7907   | 0.0697 | 50    | 238        | 239      | AHGGYSVFAGVGER    |           |         |                  |      | Mascot      |
| 1435.7539  | 1435.8242   | 0.0703 | 49    | 311        | 324      | FTQAGSEVSALLGR    |           |         |                  |      | Mascot      |
| 1439.7893  | 1439.8893   | 0.1    | 69    | 282        | 294      | VALTGLTVAEYFR     |           |         |                  |      | Mascot      |
| 1601.8104  | 1601.886    | 0.0756 | 47    | 265        | 279      | VALVYQMNPPGAR     | 55        | 99.992  |                  |      | Mascot      |
| 1601.8104  | 1601.886    | 0.0756 | 47    | 265        | 279      | VALVYQMNPPGAR     |           |         |                  |      | Mascot      |
| 1617.8053  | 1617.8818   | 0.0765 | 47    | 265        | 279      | VALVYQMNPPGAR     |           |         | Oxidation (M)[8] |      | Mascot      |
| 1650.9174  | 1650.9941   | 0.0767 | 46    | 95         | 109      | LVLVEAQHLGESTVR   | 78        | 100     |                  |      | Mascot      |
| 1650.9174  | 1650.9941   | 0.0767 | 46    | 95         | 109      | LVLVEAQHLGESTVR   |           |         |                  |      | Mascot      |
| 1780.9625  | 1781.047    | 0.0845 | 47    | 144        | 159      | IMNVIGEPDIDRGPDK  |           |         |                  |      | Mascot      |
| 1786.9575  | 1787.0184   | 0.0609 | 34    | 144        | 159      | IMNVIGEPDIDRGPDK  |           |         | Oxidation (M)[2] |      | Mascot      |
| 1842.8802  | 1842.9714   | 0.0912 | 49    | 407        | 422      | IMDPNIVGNEHYDVAR  |           |         |                  |      | Mascot      |
| 1858.8752  | 1858.9777   | 0.1025 | 55    | 407        | 422      | IMDPNIVGNEHYDVAR  |           |         | Oxidation (M)[2] |      | Mascot      |
| 1919.0959  | 1919.1879   | 0.092  | 48    | 125        | 143      | VLDSGAPKIPVGPETLG | 107       | 100     |                  |      | Mascot      |

**5. Trifunctional enzyme subunit beta**

**Analysis Information**

Report Type Protein-Peptide Summary by Spot Analysis Type Combined (MS+MSMS)  
 Sample Set Name 2011-05-04 [001300010097-2011-03-18-1] Database SwissProt  
 Analysis Name Khalil-Medicalin Chemistry[Mus Swissprot] Creation Date 05/04/2011 13:12:29  
 Reported By 05/04/2011 17:22:26 - admin Last Modified 05/04/2011 13:18:54  
 MS Acq.: Proc. Methods (Unspecified): (Unspecified)  
 Interpretation Method (Unspecified)

| Gel Idx/Pos    | 328N6                                                                                               | Instr./Gel Origin                  | Ak1152011-03-18-1 | Process Status  | Analysis Succeeded |                   |            |            |           |                |                     |
|----------------|-----------------------------------------------------------------------------------------------------|------------------------------------|-------------------|-----------------|--------------------|-------------------|------------|------------|-----------|----------------|---------------------|
| Plate [P] Name | [1] 001300010097                                                                                    | Instrument Sample Name             |                   | Spectra         | 6                  |                   |            |            |           |                |                     |
| Rank           | Protein Name                                                                                        | Accession No.                      | Protein Score     | Protein C. I. % | Total Ion Score    | Total Ion C. I. % | Protein MW | Protein PI | Spot Name | Pep. User name | Department          |
| 2              | RecName: Full=Trifunctional enzyme subunit beta, mitochondrial; AltName: Full=TP-beta; Includes: Re | gi 51316075 sp Q9SUY0.1 ECHB_MOUSE | 91                | 99.999          | 27                 | 94.125            | 51638.5    | 9.43       | A-L-1     | 11 Kha         | Medicinal Chemistry |

**Analysis Information**

Report Type Protein-Peptide Summary by Spot Analysis Type Combined (MS+MSMS)  
 Sample Set Name 2011-05-04 [001300010097-2011-03-18-1] Database SwissProt  
 Analysis Name Khalil-Medicalin Chemistry[Mus Swissprot] Creation Date 05/04/2011 13:12:29  
 Reported By 05/04/2011 17:22:25 - admin Last Modified 05/04/2011 13:18:54  
 MS Acq.: Proc. Methods (Unspecified): (Unspecified)  
 Interpretation Method (Unspecified)

**Peptide Information**

| Calc. Mass | Obsrv. Mass | ± da    | ± ppm | Start Seq. | End Seq. | Sequence          | Ion Score | C. I. % | Modification      | Rank | Result Type |
|------------|-------------|---------|-------|------------|----------|-------------------|-----------|---------|-------------------|------|-------------|
| 905.5203   | 905.5383    | 0.018   | 20    | 231        | 239      | LAAFAVSR          |           |         |                   |      | Mascot      |
| 937.5577   | 937.5787    | 0.021   | 22    | 83         | 91       | AALSGLLHR         | 27        | 94.125  |                   |      | Mascot      |
| 937.5577   | 937.5787    | 0.021   | 22    | 83         | 91       | AALSGLLHR         |           |         |                   |      | Mascot      |
| 984.5836   | 984.6089    | 0.0253  | 26    | 54         | 62       | NIVVVEGVR         |           |         |                   |      | Mascot      |
| 1055.6095  | 1055.5413   | -0.0682 | -65   | 408        | 417      | TKVGSPPLEK        |           |         |                   |      | Mascot      |
| 1154.5146  | 1154.5502   | 0.0356  | 31    | 240        | 248      | MEQDEYALR         |           |         |                   |      | Mascot      |
| 1170.5095  | 1170.5463   | 0.0368  | 31    | 240        | 248      | MEQDEYALR         |           |         | Oxidation (M)[1]  |      | Mascot      |
| 1545.7889  | 1545.8134   | 0.0445  | 29    | 279        | 292      | DNGRPSLSQMAK      |           |         |                   |      | Mascot      |
| 1561.7639  | 1561.8085   | 0.0446  | 29    | 279        | 292      | DNGRPSLSQMAK      |           |         | Oxidation (M)[12] |      | Mascot      |
| 1683.8701  | 1683.9056   | 0.0355  | 21    | 255        | 269      | KAQDEGHLSIDVFPK   |           |         |                   |      | Mascot      |
| 1691.8941  | 1691.743    | 0.0489  | 29    | 393        | 406      | AMDSDFWQNYMGR     |           |         |                   |      | Mascot      |
| 1714.8799  | 1714.9293   | 0.0494  | 29    | 336        | 349      | AYLRDFVVSQDPK     |           |         |                   |      | Mascot      |
| 1777.8538  | 1777.902    | 0.0482  | 27    | 240        | 254      | MEQDEYALRSHSLAK   |           |         |                   |      | Mascot      |
| 1868.0786  | 1867.9825   | -0.0961 | -51   | 46         | 62       | TLAKPNKINIVVVEGVR |           |         |                   |      | Mascot      |
